# Supplementary material for: Formation of unusual microphase-separated ultrathin films of poly(vinyl catechol-block-styrene) (PVCa-b-PSt) at the air–water interface by solution casting onto water
Source: Royal Society of Chemistry journal article supplement (doi:10.1039/c7ra06574d), 2017-01-01
Supplement: c7ra06574d1.pdf [file c7ra06574d1.pdf]

## Electronic Supplementary Information

### Formation of Unusual Microphase-Separated Ultrathin Films of Poly(vinyl catechol-block-styrene) (PVCa-b-PSt) at the Air-Water Interface by Solution Casting onto Water

Hiroshi Yabu<sup>1</sup> and Shusaku Nagano<sup>2</sup>

<sup>1</sup>WPI-Advanced Institute for Materials Research, Tohoku University, 2-1-1, Katahira, Aoba-Ku, Sendai 980-8577, Japan

<sup>2</sup>Nagoya University Venture Business Laboratory, Furocho, Chikusa-Ku, Nagoya 464-8603, Japan

#### SI 1: Synthesis of Poly(vinyl catechol-*random*-styrene) (PVCa-*ran*-PSt)

**Polymerization:** 3,4-dimethoxy styrene (DMSt, >99%) and styrene (St, GR) was purchased from SIGMA-Aldrich and WAKO Chemical Industry, Co. Ltd., respectively. St was washed with 1M NaOH aq. and then dried over molecular sieves (4A1/16, WAKO Chemical Industry, Co. Ltd.). Tetrahydrofuran (THF), methanol (MeOH), dimethylformamide (DMF), acetonitrile and dichloromethane (CH<sub>2</sub>Cl<sub>2</sub>) were purchased from WAKO Chemical Industry, Co. Ltd. and used without further purification. 2,2'-azobis(isobutyronitril) (AIBN, WAKO/GR) was recrystallized in MeOH before use.

St (2.5 g, 24 mmol), DMSt (349 mg, 2.1 mmol) and AIBN (43 mg, 0.26 mmol) were dissolved in 4 mL of dried DMF with stirring in a grove box. The solution was degassed by 3 cycles of freeze-thaw-evacuate and finally the atmosphere was filled with N<sub>2</sub> gas. The solution was heated by aluminum block heater at 60 °C for 20 h. The polymerized sample was reprecipitated in MeOH. After 3 h stirring, the supernatant was removed by decantation and polymer was corrected by centrifugation (3,000 rpm, 15 min), and then, the white precipitates (PDMSt-*ran*-PSt) were dried *in vacuo* for overnight.

**Deprotection:** Yielded white powder (505 mg) was dissolved in 25 mL of CH<sub>2</sub>Cl<sub>2</sub>, and then 2 mL of BBr<sub>3</sub> solution of CH<sub>2</sub>Cl<sub>2</sub> was slowly added into the solution. After stirring for 12 h, 200 mL of 1M HCl aq. was added into the solution, the CH<sub>2</sub>Cl<sub>2</sub> phase was corrected after 3 h stirring. The corrected CH<sub>2</sub>Cl<sub>2</sub> phase was dropped into the MeOH and the white precipitate was corrected by centrifugation (3,000 rpm, 15 min). The white precipitates (PVCa-*ran*-PSt) were dried *in vacuo* for overnight. 384 mg white powder was obtained (yield=76%).

**<sup>1</sup>H-NMR:** <sup>1</sup>H-NMR spectra before/after deprotection of methoxy groups were measured by using JNM-LA400, 400 MHz, Bruker. The polymer was dissolved in CDCl<sub>3</sub> with TMS for NMR measurement. Obtained spectra before and after deprotection of methoxy groups were shown in

Figure S1 and S2, respectively. From the  $^1\text{H}$ -NMR spectra, deprotection of methoxy groups was confirmed since signals at  $\delta_{\text{H}}=3.57$  and  $3.71$ , which were attributed to methoxy groups of DMSt moieties, in the spectrum of before  $\text{BBr}_3$  treatment were disappeared in that of after treatment. Copolymerization ratio between St and DMSt was confirmed as 89:11, which means the content of PVCa was 11 %.

GPC: Molecular weight of obtained PDMSt-*ran*-PSt was measured by gel permeation chromatography (GPC, HLC-8320, TOSOH) with using THF as a carrier solvent.  $M_n=25.5$  kg/mol,  $M_w=42.6$  kg/mol,  $M_w/M_n=1.7$ .

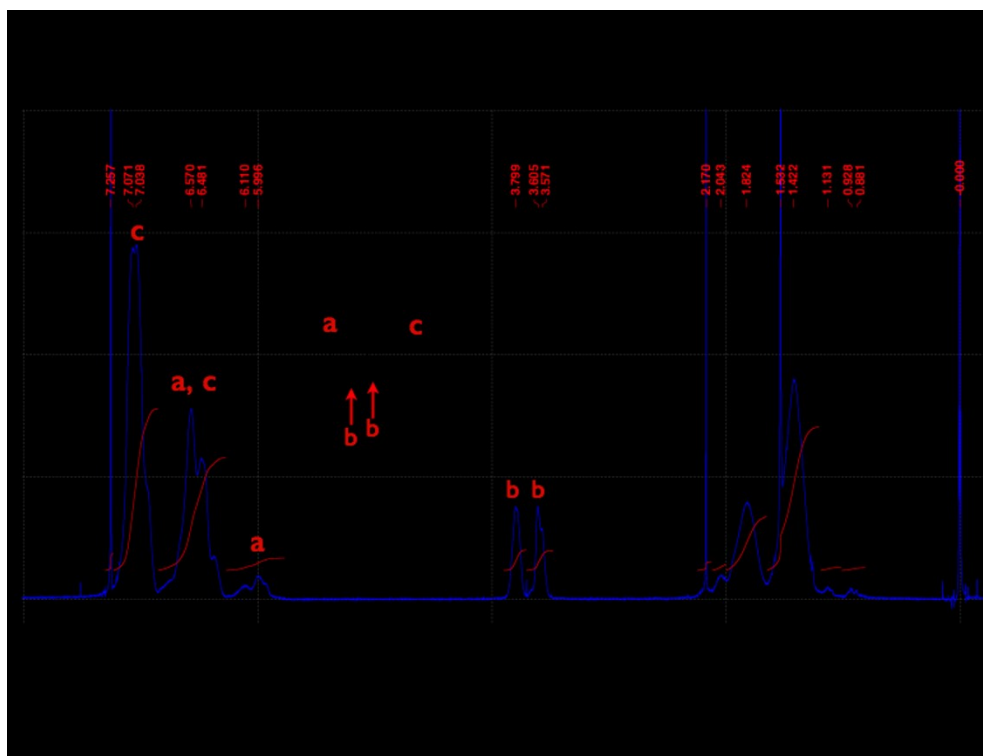

Figure S1.  $^1\text{H}$ -NMR spectrum of PDMSt-*ran*-PSt.

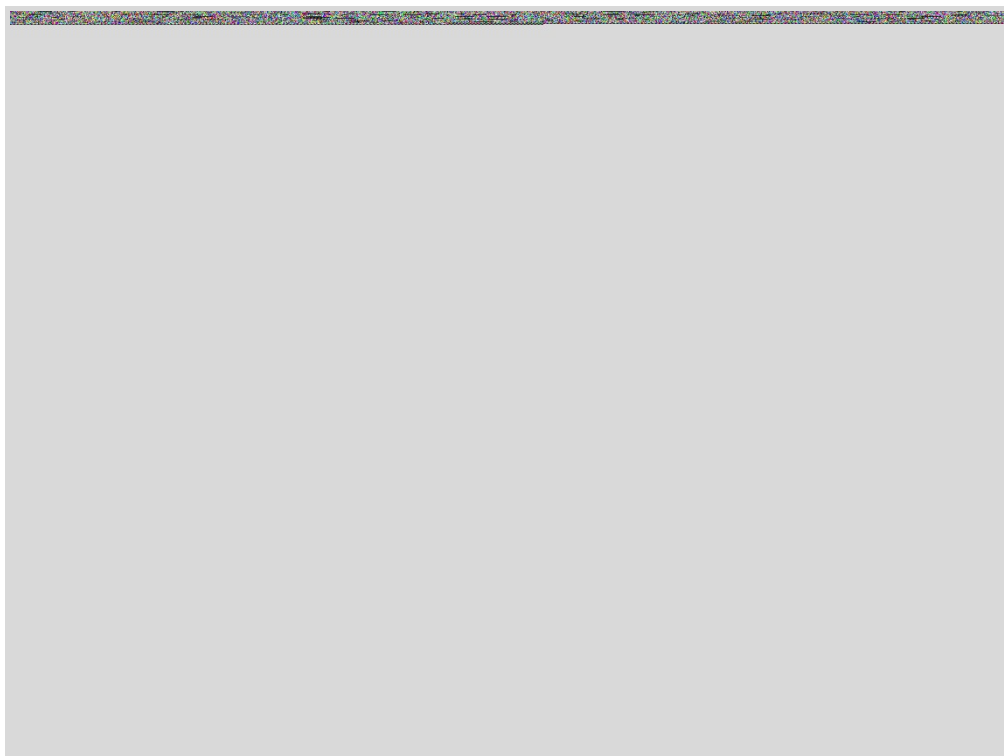

Figure S2.  $^1\text{H}$ -NMR spectrum of PVCa-*ran*-PSt.

SI 2. Close-up cross-sectional TEM image of PVCa-*b*-PSt ultrathin film.

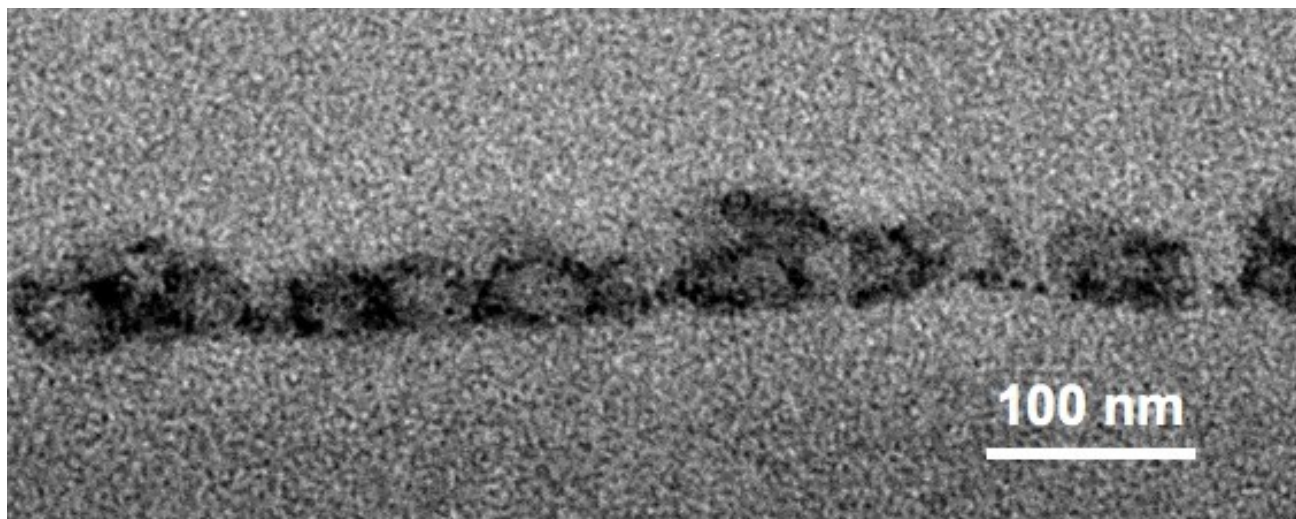

Figure S3. Close-up cross-sectional TEM image of PVCa-*b*-PSt ultrathin film.

SI 3. Close-up and cross-sectional TEM images of a silver nanoparticle embedded PVCa-*b*-PSt ultrathin film.
